# Supplementary material
Source: PubMed Central journal article supplement (PMC6802484)
Supplement: jamapsychiatry-77-121-s002.pdf [file jamapsychiatry-77-121-s002.pdf]

## Supplementary Online Content

Valiengo LCL, Goerigk S, Gordon PC, et al. Efficacy and safety of transcranial direct current stimulation for treating negative symptoms in schizophrenia: a randomized clinical trial. *JAMA Psychiatry*. Published online October 16, 2019.  
doi:10.1001/jamapsychiatry.2019.3199

**eAppendix 1.** Sociodemographic variables analyzed as predictors of response

**eAppendix 2.** Detailed statistical analysis

**eTable 1.** Statistical analysis of primary and secondary outcomes

**eTable 2.** Change of PANSS negative symptoms subscale in percentages

**eTable 3.** Summary of all scales used in the trial at each measurement

**eTable 4.** Results of moderation analyses

**eTable 5.** Change in PANSS negative symptoms subscale score for subgroups showing significant moderation effects

**eTable 6.** Group differences in PANSS negative symptoms subscale single item scores

**eFigure 1.** Changes in individual items of the PANSS negative symptoms subscale

**eFigure 2.** Plot showing individual trajectories for patients' PANNS negative symptoms subscale scores

**eReferences.**

This supplementary material has been provided by the authors to give readers additional information about their work.

**eAppendix 1.** Sociodemographic variables analyzed as predictors of response

They were age, gender, years of study, employment and marital status, ethnicity, disease duration, number of hospitalizations, previous use of electroconvulsive therapy (ECT), use of clozapine, haloperidol dose-equivalents, as in (Andreasen, Pressler, Nopoulos, Miller, & Ho, 2010) and presence of treatment resistant (lack of satisfactory clinical response to treatment with at least two antipsychotic drugs from different groups, used with therapeutic doses and for at least six weeks of treatment) and ultra-treatment resistant (those meeting criteria for treatment-resistant schizophrenia and with no response to at least six months of clozapine use in doses of at least 300 mg/day) schizophrenia, per recent guidelines (Correll, Kishimoto, Nielsen, & Kane, 2011; Howes et al., 2017).

## **eAppendix 2.** Detailed statistical analysis

In the LMM models, measurements were considered to be nested within patients and patients were considered to be nested within study centers, assuming an unstructured covariance matrix between time points. Time, group and their cross-level interaction were fixed factors. On the patient level, we included a random effect for the intercept taking individual symptomatic variation at baseline into account. In order to account for varying change rates between patients, random slopes were added to the model, if they significantly improved model fit. Nested models were compared using  $\chi^2$ -likelihood ratio tests. Since group allocation was performed on the patient level (center crossed effect), center specific effects were controlled by including time, treatment and their interaction as random effects on the center level. Parameters were computed using maximum likelihood estimation with Satterthwaite approximation to degrees of freedom. We used similar methodology than in a previous study from our group (Sampaio-Junior et al., 2018).

Effects sizes were calculated as Cohen's d and Odds Ratio for continuous and binary outcomes, respectively. Cohen's d was computed for the regression estimates using the formula  $d = (\text{Beta} \times \text{Time}) / \text{SD}_{\text{draw}}$  provided by (Raudenbush & Xiao-Feng, 2001) and as suggested by (Feingold, 2009), in order to provide effect sizes for linear growth models in the same metric as for classical analyses. We provided the number needed to treat (NNT), which assesses the effectiveness of a clinical intervention, for all outcomes (Kraemer & Kupfer, 2006). For continuous outcomes, they were obtained by transformation of Cohen's d using the cumulative distribution function of the standard normal distribution (Preti, 2015).

Results showed that optimal model fit was found for a random-intercept fixed-slope solution, as including symptomatic change as a random factor resulted in no significant improvement ( $\chi^2 = 0.11$ ;  $P = 0.946$ ). There were no differences according to study site.

**eTable 1.** Statistical analysis of primary and secondary outcomes

| Continuous Outcomes                       | Time  |               |       | Time x Group |               |        | Slope of Change (Beta) |            | Effect size for time x group interaction |                         |
|-------------------------------------------|-------|---------------|-------|--------------|---------------|--------|------------------------|------------|------------------------------------------|-------------------------|
|                                           | F     | df [Num, Den] | P     | F            | df [Num, Den] | P      | Active Group           | Sham Group | d (95% CI)                               | NNT (95% CI)            |
| <b>Trajectory up to week 6</b>            |       |               |       |              |               |        |                        |            |                                          |                         |
| PANSS negative symptoms (Primary Outcome) | 65.90 | 1,394.11      | <.001 | 12.47        | 1,394.11      | <0.001 | -0.87                  | -0.34      | 0.36 (0.16 to 0.55)                      | 5.04 (3.29 to 11.22)    |
| PANSS positive symptoms                   | 19.27 | 1,98.79       | <.001 | 0.48         | 1,98.79       | 0.49   | -0.35                  | -0.48      | -0.14 (-0.53 to 0.25)                    | -12.71 (7 to -3.4)      |
| PANSS general symptoms                    | 18.44 | 1,391.43      | <.001 | 1.07         | 1,391.43      | 0.30   | -0.47                  | -0.77      | -0.1 (-0.3 to 0.09)                      | -17.74 (-5.95 to 19.71) |
| PANSS total                               | 16.82 | 1,1.09        | 0.136 | 1.03         | 1,1.08        | 0.49   | -1.40                  | -0.87      | 0.20 (-0.09 to 0.60)                     | 8.75 (3.07 to -9.41)    |
| PANSS-FSNS                                | 55.49 | 1,387.23      | <.001 | 5.99         | 1,387.32      | 0.015  | -0.88                  | -0.44      | 0.25 (0.05 to 0.45)                      | 7.13 (4.01 to 35.46)    |
| SANS                                      | 40.87 | 1,98.18       | <.001 | 0.001        | 1,98.18       | 0.97   | -8.20                  | -8.11      | 0.01 (-0.39 to 0.4)                      | 177.25 (-4.60 to 4.49)  |
| CDSS                                      | 4.63  | 1,1.65        | 0.190 | 1.10         | 1,2.11        | 0.40   | -0.73                  | -0.26      | 0.19 (-0.17 to 0.55)                     | 9.45 (3.31 to -10.27)   |
| AHRS                                      | 0.25  | 1,387.29      | 0.620 | 0.62         | 1,387.29      | 0.43   | 0.23                   | -0.05      | -0.08 (-0.28 to 0.12)                    | -22.22 (14.87 to -6.39) |

|                                 |       |          |       |       |          |        |       |       |                       |                         |
|---------------------------------|-------|----------|-------|-------|----------|--------|-------|-------|-----------------------|-------------------------|
| GAF                             | 3.99  | 1,87.87  | 0.049 | 0.15  | 1,87.87  | 0.70   | 2.60  | 1.76  | 0.08 (-0.5 to 0.34)   | 21.67 (5.32 to -3.62)   |
| <b>Trajectory up to week 12</b> |       |          |       |       |          |        |       |       |                       |                         |
| PANSS negative symptoms         | 66.08 | 1,491.43 | <.001 | 16.87 | 1,491.43 | <0.001 | -0.70 | -0.23 | 0.37 (0.19 to 0.55)   | 4.84 (3.32 to 9.18)     |
| PANSS positive symptoms         | 28.87 | 1,486.35 | <.001 | 0.24  | 1,486.36 | 0.63   | -0.28 | -0.33 | -0.04 (-0.22 to 0.13) | -40.19 (13.28 to -8.02) |
| PANSS general symptoms          | 13.92 | 1,485.18 | <.001 | 0.30  | 1,485.18 | 0.58   | -0.35 | -0.47 | -0.05 (-0.23 to 0.13) | -35.46 (-7.74 to 13.65) |
| PANSS total                     | 13.86 | 1,1.46   | 0.103 | 1.21  | 1,1.51   | 0.42   | -1.60 | -0.84 | 0.30 (0.23 to 0.82)   | 6.05 (2.28 to -7.70)    |
| PANSS-FSNS                      | 55.55 | 1,480.39 | <.001 | 10.27 | 1,480.40 | 0.001  | -0.72 | -0.29 | 0.29 (0.11 to 0.47)   | 6.16 (3.84 to 16.13)    |
| SANS                            | 53.70 | 1,193.08 | <.001 | 0.12  | 1,193.08 | 0.73   | -4.64 | -5.10 | -0.05 (-0.33 to 0.23) | -35.46 (-5.42 to 7.74)  |
| CDSS                            | 3.62  | 1,1.79   | 0.212 | 1.11  | 1,1.54   | 0.43   | -0.60 | -0.29 | 0.19 (-0.17 to 0.56)  | 9.17 (3.28 to -10.63)   |
| AHRS                            | 1.18  | 1,481.7  | 0.279 | 0.37  | 1,481.7  | 0.54   | 0.23  | 0.06  | -0.06 (-0.23 to 0.12) | -31.96 (14.41 to -7.61) |

|                            |      |          |       |                |          |          |                          |                        |                      |                       |
|----------------------------|------|----------|-------|----------------|----------|----------|--------------------------|------------------------|----------------------|-----------------------|
| GAF                        | 4.88 | 1,172.31 | 0.029 | 0.08           | 1,172.31 | 0.77     | 1.30                     | 1.00                   | 0.04 (-0.34 to 0.25) | 40.04 (7.01 to -5.22) |
| <b>Binary Outcomes</b>     |      |          |       | <b>z-value</b> |          | <b>P</b> | <b>Active Group (OR)</b> | <b>Sham Group (OR)</b> |                      | <b>NNT (95% CI)</b>   |
| <b>Week 6</b>              |      |          |       |                |          |          |                          |                        |                      |                       |
| Response (20% improvement) |      |          |       | 3.69           |          | <0.001   | 17.78                    | 0.04                   |                      | 2.78 (1.98 to 4.68)   |
| <b>Week 12</b>             |      |          |       |                |          |          |                          |                        |                      |                       |
| Response (20% improvement) |      |          |       | 3.57           |          | <0.001   | 16.29                    | 0.04                   |                      | 2.88 (2.02 to 4.98)   |

Note: Numbers rounded to two decimal points; <sup>a</sup> model included random slopes because improved model fit was indicated by  $\chi^2$ -likelihood-ratio-test; PANSS Positive and Negative Syndrome Scale; CDSS Calgary Depression Scale for Schizophrenia; AHRs Average scores of Auditory Hallucinations Scale; GAF Global Assessment of Functioning; SANS, Scale for the Assessment of Negative Symptoms, df degrees of freedom; Num numerator, Den denominator; NNT Number needed to treat; OR Odds Ratio. d Cohens d; Effect sizes are representative of the regression model slopes.

**eTable 2.** Change of PANSS negative symptoms subscale in percentages

| <b>Group</b>           | <b>Week 1</b>     | <b>Week 2</b>     | <b>Week 4</b>     | <b>Week 6</b>     | <b>Week 12</b>    |
|------------------------|-------------------|-------------------|-------------------|-------------------|-------------------|
| Active tDCS, mean (SD) | -11.78<br>(10.85) | -12.54<br>(12.43) | -10.58<br>(13.58) | -17.65<br>(12.72) | -15.80<br>(15.63) |
| Sham tDCS, mean (SD)   | -9.20<br>(11.53)  | -6.07<br>(11.03)  | -7.91<br>(14.25)  | -7.45<br>(7.40)   | -6.97<br>(7.68)   |

Note: Numbers rounded to two decimal points.

**eTable 3.** Summary of all scales used in the trial at each measurement

| Characteristic                     | Baseline         | Week 1           | Week 2           | Week 4           | Week 6           | Week 12          |
|------------------------------------|------------------|------------------|------------------|------------------|------------------|------------------|
| <b>Active Group</b>                |                  |                  |                  |                  |                  |                  |
| PANSS negative symptoms, mean (SD) | 25.00<br>(3.93)  | 22.04<br>(4.4)   | 21.81<br>(4.6)   | 22.27<br>(4.42)  | 20.51<br>(4.27)  | 20.94<br>(4.64)  |
| PANSS positive symptoms, mean (SD) | 14.26<br>(4.27)  | 14.20<br>(4.91)  | 13.29<br>(4.58)  | 13.68<br>(4.54)  | 13.15<br>(3.86)  | 13.38<br>(3.84)  |
| PANSS general symptoms, mean (SD)  | 34.36<br>(10.21) | 32.08<br>(8.91)  | 31.77<br>(9.34)  | 31.53<br>(9.38)  | 32.67<br>(8.63)  | 32.02<br>(7.69)  |
| PANSS total symptoms, mean (SD)    | 73.62<br>(15.76) | 68.32<br>(15.52) | 66.88<br>(15.98) | 67.45<br>(15.07) | 66.28<br>(13.98) | 66.00<br>(12.64) |
| PANSS-FSNS, mean (SD)              | 24.22<br>(5.13)  | 21.08<br>(4.57)  | 20.83<br>(4.96)  | 21.22<br>(5.24)  | 19.78<br>(4.85)  | 19.66<br>(5.03)  |
| SANS, mean (SD)                    | 60.12<br>(13.80) | ---              | ---              | ---              | 52.07<br>(15.01) | 50.40<br>(17.04) |
| CDSS, mean (SD)                    | 2.32<br>(3.77)   | 2.02<br>(3.25)   | 1.38<br>(2.18)   | 1.70<br>(2.38)   | 1.02<br>(1.68)   | 1.24<br>(1.86)   |
| AHRS, mean (SD)                    | 9.44<br>(11.91)  | 7.66<br>(11.79)  | 7.88<br>(11.35)  | 9.47<br>(12.59)  | 9.91<br>(12.09)  | 9.91<br>(11.75)  |
| GAF, mean (SD)                     | 46.47<br>(12.4)  | ---              | ---              | ---              | 48.74<br>(11.77) | 49.30<br>(10.61) |
| <b>Sham Group</b>                  |                  |                  |                  |                  |                  |                  |
| PANSS negative symptoms, mean (SD) | 25.10<br>(3.44)  | 22.88<br>(4.77)  | 23.6<br>(4.29)   | 23.12<br>(4.77)  | 23.26<br>(3.91)  | 23.36<br>(3.75)  |
| PANSS positive symptoms, mean (SD) | 14.24<br>(4.09)  | 14.22<br>(4.74)  | 12.82<br>(4.23)  | 12.84<br>(3.96)  | 12.54<br>(4.43)  | 12.98<br>(4.04)  |
| PANSS general symptoms, mean (SD)  | 34.58<br>(8.66)  | 33.80<br>(9.19)  | 31.40<br>(9.75)  | 31.42<br>(9.99)  | 31.92<br>(8.34)  | 32.65<br>(8.03)  |



|                                 |                  |                  |                  |                  |                  |                  |
|---------------------------------|------------------|------------------|------------------|------------------|------------------|------------------|
| PANSS total symptoms, mean (SD) | 73.92<br>(13.36) | 70.90<br>(15.55) | 67.82<br>(15.33) | 67.38<br>(15.83) | 67.49<br>(13.76) | 69.04<br>(12.86) |
| PANSS-FSNS, mean (SD)           | 24.22<br>(3.56)  | 21.62<br>(5.45)  | 22.20<br>(4.50)  | 21.65<br>(4.98)  | 21.98<br>(3.70)  | 22.10<br>(3.76)  |
| SANS, mean (SD)                 | 62.32<br>(11.11) | ---              | ---              | ---              | 53.96<br>(14.05) | 51.96<br>(14.28) |
| CDSS, mean (SD)                 | 2.26<br>(3.15)   | 2.68<br>(3.04)   | 1.56<br>(2.47)   | 1.51<br>(2.28)   | 1.59<br>(2.45)   | 1.57<br>(2.48)   |
| AHRS, mean (SD)                 | 7.66<br>(12.74)  | 6.72<br>(11.7)   | 6.52<br>(11.16)  | 7.69<br>(12.16)  | 6.88<br>(11.48)  | 7.80<br>(12.11)  |
| GAF, mean (SD)                  | 46.40<br>(11.04) | ---              | ---              | ---              | 48.21<br>(11.84) | 48.57<br>(11.09) |

Note: Numbers rounded to two decimal points.

**eTable 4.** Results of moderation analyses

| Characteristic                          | Moderator |              | Moderator x Group |              |
|-----------------------------------------|-----------|--------------|-------------------|--------------|
|                                         | F-Value   | P-Value      | F-Value           | P-Value      |
| Age in years                            | 1.17      | 0.282        | 0.11              | 0.737        |
| Women                                   | 1.95      | 0.165        | 2.57              | 0.112        |
| Years of study                          | 0.06      | 0.813        | 0.06              | 0.813        |
| Unemployed                              | 0.53      | 0.861        | 0.09              | 0.912        |
| Not married                             | 0.73      | 0.485        | 2.34              | 0.130        |
| Self-declared white ethnicity           | 0.04      | 0.988        | 0.12              | 0.892        |
| Duration of disease in years            | 0.07      | 0.792        | 0.11              | 0.739        |
| Number of hospitalizations              | 5.68      | <b>0.019</b> | 0.64              | 0.426        |
| Previous clozapine use                  | 4.62      | <b>0.035</b> | 4.82              | <b>0.031</b> |
| Treatment resistant schizophrenia       | 4.49      | <b>0.037</b> | 4.25              | <b>0.042</b> |
| Ultra-treatment resistant schizophrenia | 4.51      | <b>0.036</b> | 5.21              | <b>0.025</b> |
| Equivalent Haloperidol dose, mg/day     | 5.46      | <b>0.022</b> | 4.96              | <b>0.029</b> |

|                                                   |      |       |      |       |
|---------------------------------------------------|------|-------|------|-------|
| Electroconvulsive therapy (ECT)                   | 0.02 | 0.89  | 0.54 | 0.464 |
| Patients with no auditory hallucinations per AHRS | 1.09 | 0.298 | 0.20 | 0.653 |
| Smoker                                            | 0.18 | 0.67  | 0.04 | 0.85  |
| Patients with no depressive symptoms per CDSS     | 1.18 | 0.280 | 0.08 | 0.778 |

Note: Numbers rounded to two decimal points; PANSS Positive and Negative Syndrome Scale; CDSS Calgary Depression Scale for Schizophrenia; AHRS Average scores of Auditory Hallucinations Scale

**eTable 5.** Change in PANSS negative symptoms subscale score for subgroups showing significant moderation effects

| Characteristic                                     |          | Active tDCS     | Sham tDCS       | Difference |
|----------------------------------------------------|----------|-----------------|-----------------|------------|
|                                                    |          |                 |                 |            |
| Clozapine use, mean (SD)                           | Never    | -5.94<br>(4.28) | -2.32<br>(1.53) | 3.63       |
|                                                    | Previous | -3.57<br>(1.81) | -1.11<br>(1.62) | 2.46       |
|                                                    | Current  | -3.11<br>(2.72) | -2.43<br>(1.99) | 0.68       |
| Treatment resistant schizophrenia, mean (SD)       | Yes      | -3.86<br>(3.00) | -1.83<br>(1.76) | 2.04       |
|                                                    | No       | -6.56<br>(4.56) | -1.87<br>(2.03) | 4.69       |
| Ultra-treatment resistant schizophrenia, mean (SD) | Yes      | -3.29<br>(2.51) | -1.95<br>(2.01) | 1.34       |
|                                                    | No       | -5.57<br>(4.17) | -1.86<br>(1.66) | 3.89       |
| Equivalent Haloperidol dose, mg/day - slope        |          | 0.25            | 0.006           | 0.24       |

Note: Numbers rounded to two decimal points; Change in the score was calculated as the score at baseline minus the score at 6 weeks

**eTable 6.** Group differences in PANSS negative symptoms subscale single item scores

| PANSS Negative Item                          | Sham tDCS<br>(N=50) | Active tDCS<br>(N=50) | Sham tDCS vs. Active tDCS |                  |               |
|----------------------------------------------|---------------------|-----------------------|---------------------------|------------------|---------------|
|                                              |                     |                       | Difference in Scores      | P Value          | FDR corrected |
| <b>Trajectory to Week 6</b>                  |                     |                       |                           |                  |               |
| Blunted affect                               | -0.37 ± 0.73        | -0.83 ± 0.9           | 0.46 (0.12 to 0.79)       | <b>0.004</b>     | <b>0.031</b>  |
| Emotional withdrawal                         | -0.29 ± 0.68        | -0.78 ± 0.84          | 0.5 (0.18 to 0.81)        | <b>0.021</b>     | <b>0.035</b>  |
| Poor rapport                                 | -0.14 ± 0.74        | -0.74 ± 0.93          | 0.6 (0.25 to 0.94)        | <b>0.021</b>     | <b>0.035</b>  |
| Passive/apathetic social withdrawal          | -0.67 ± 1.11        | -0.74 ± 1.02          | 0.07 (-0.37 to 0.5)       | 0.827            | 0.827         |
| Difficulty in abstract thinking              | -0.2 ± 0.96         | -0.57 ± 0.83          | 0.36 (0 to 0.73)          | <b>0.025</b>     | <b>0.035</b>  |
| Lack of spontaneity and flow of conversation | -0.08 ± 0.98        | -0.63 ± 1.1           | 0.55 (0.12 to 0.97)       | <b>0.012</b>     | <b>0.035</b>  |
| Stereotyped thinking                         | -0.12 ± 0.56        | 0.17 ± 3.3            | -0.29 (-1.27 to 0.69)     | 0.460            | 0.536         |
| <b>Trajectory to Week 12</b>                 |                     |                       |                           |                  |               |
| Blunted affect                               | -0.4 ± 0.74         | -0.64 ± 1.07          | 0.25 (-0.13 to 0.63)      | <b>0.019</b>     | <b>0.028</b>  |
| Emotional withdrawal                         | -0.42 ± 0.65        | -0.89 ± 0.98          | 0.47 (0.13 to 0.82)       | <b>0.011</b>     | <b>0.028</b>  |
| Poor rapport                                 | 0.08 ± 0.68         | -0.58 ± 0.99          | 0.66 (0.31 to 1.01)       | <b>&lt;0.001</b> | <b>0.006</b>  |
| Passive/apathetic social withdrawal          | -0.65 ± 1.14        | -0.93 ± 1.25          | 0.29 (-0.21 to 0.78)      | 0.262            | 0.262         |
| Difficulty in abstract thinking              | -0.08 ± 0.77        | -0.42 ± 1.01          | 0.34 (0.03 to 0.71)       | <b>0.016</b>     | <b>0.028</b>  |

|                                              |              |             |                     |              |              |
|----------------------------------------------|--------------|-------------|---------------------|--------------|--------------|
| Lack of spontaneity and flow of conversation | -0.08 ± 1.01 | -0.58 ± 1.2 | 0.49 (0.04 to 0.95) | <b>0.020</b> | <b>0.028</b> |
| Stereotyped thinking                         | -0.04 ± 0.71 | 0.24 ± 3.22 | 0.28 (-1.26 to 0.7) | 0.232        | 0.262        |

**eFigure 1.** Changes in individual items of the PANSS negative symptoms subscale

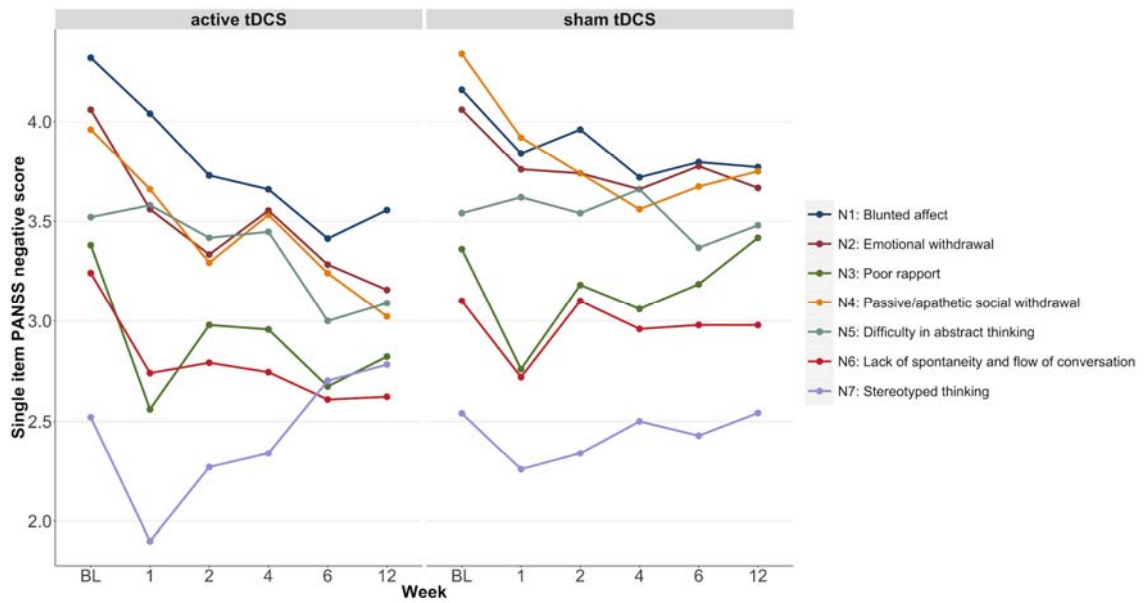

Note: Displayed are the mean reduction (bold) of the single items of the PANSS negative scale (intention-to-treat-analysis) in both treatment groups from baseline to week 12; Higher scores indicate more severe negative symptoms; BL Baseline.

**eFigure 2.** Plot showing individual trajectories for patients' PANSS negative symptoms subscale scores

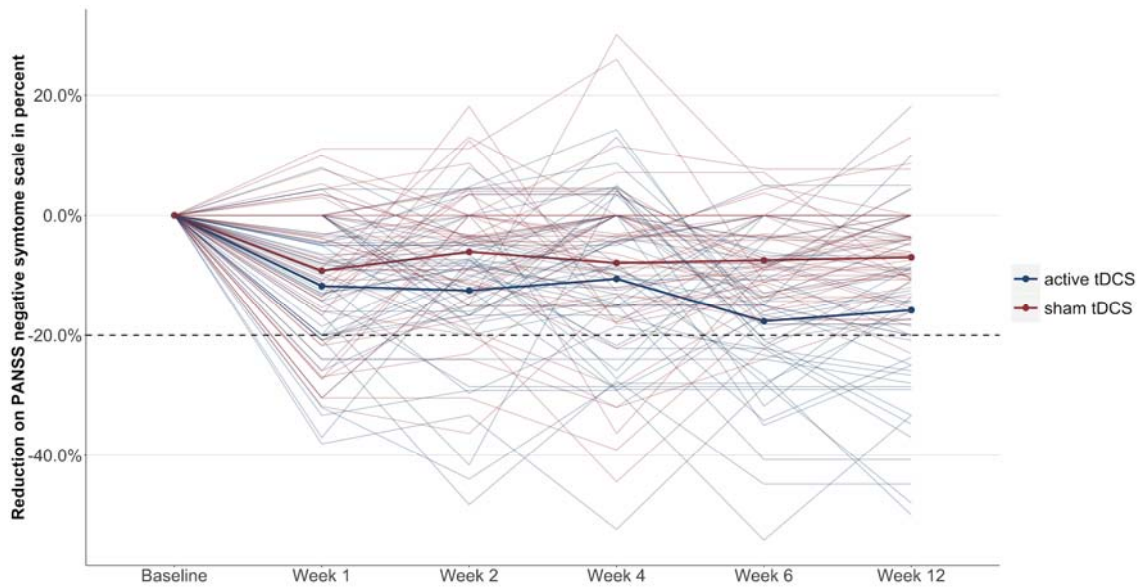

Note: Displayed are the mean reduction (bold) of the PANSS negative symptom scores (intention-to-treat-analysis) in both treatment groups from baseline to week 12 as well as patients' individual trajectories (faded). Dashed line at 20% reduction indicates threshold for showing response. Higher scores indicate more severe negative symptoms.



## eReferences.

- Andreasen, N. C., Pressler, M., Nopoulos, P., Miller, D., & Ho, B.-C. (2010). Antipsychotic dose equivalents and dose-years: a standardized method for comparing exposure to different drugs. *Biological Psychiatry*, *67*(3), 255–262.
- Correll, C. U., Kishimoto, T., Nielsen, J., & Kane, J. M. (2011). Quantifying clinical relevance in the treatment of schizophrenia. *Clinical Therapeutics*, *33*(12), B16–B39.
- Feingold, A. (2009). Effect sizes for growth-modeling analysis for controlled clinical trials in the same metric as for classical analysis. *Psychological Methods*, *14*(1), 43–53.
- Howes, O. D., McCutcheon, R., Agid, O., de Bartolomeis, A., van Beveren, N. J. M., Birnbaum, M. L., ... Correll, C. U. (2017). Treatment-Resistant Schizophrenia: Treatment Response and Resistance in Psychosis (TRRIP) Working Group Consensus Guidelines on Diagnosis and Terminology. *The American Journal of Psychiatry*, *174*(3), 216–229.
- Kraemer, H. C., & Kupfer, D. J. (2006). Size of treatment effects and their importance to clinical research and practice. *Biological Psychiatry*, *59*, 990–996.
- Preti, A. (2015). How to calculate the Number Needed to Treat (NNT) from Cohen's d or Hedges' g. Retrieved from <https://rpubs.com/RatherBit>
- Raudenbush, S. W., & Xiao-Feng, L. (2001). Effects of study duration, frequency of observation, and sample size on power in studies of group differences in polynomial change. *Psychological Methods*, *6*(4), 387–401.
- Sampaio-Junior, B., Tortella, G., Borrione, L., Moffa, A. H., Machado-Vieira, R., Cretaz, E., ... Brunoni, A. R. (2018). Efficacy and Safety of Transcranial Direct Current Stimulation as an Add-on Treatment for Bipolar Depression: A Randomized Clinical Trial. *JAMA Psychiatry*, *75*(2), 158–166.
